# Supplementary material for: Fine-tuning the onset of myogenesis by homeobox proteins that interact with theMyf5limb enhancer
Source: Oxford University Press journal article supplement (doi:10.1242/bio.014068), 2015-11-04
Supplement: bio014068supp.pdf [file bio014068supp.pdf]

**Table S1. Primer sequences.** Mutated nucleotides are indicated in bold.

| Primer name                                  | Sequence 5'-3'                                         |
|----------------------------------------------|--------------------------------------------------------|
| <b>Primers for site-directed mutagenesis</b> |                                                        |
| HB1-Fwd                                      | TAGGT <b>ACC</b> CATAAAGGCATGACTCCGGACATGG             |
| HB1-Rev                                      | ATGGT <b>ACC</b> TATCCAGCTTAAAGGCCTTCCCAAC             |
| HB2-Fwd                                      | ACT <b>CCGG</b> ACATGGTAACTGGAGAAATGCTTTC              |
| HB2-Rev                                      | TGT <b>CCGG</b> AGTCATGCCTTTATGATTATATCCAGC            |
| HB3-Fwd                                      | <b>GAAGCCA</b> ATGGGGACATTTAAACTCCCTGGGGC              |
| HB3-Rev                                      | CCAT <b>TGGTCTT</b> CCCAAGCTAAAATACAGACATGC            |
| HB2*                                         | GCATTTCTCCAGTTACCAT <b>GGA</b> ATTAGTCATGCCTTTATGGTACC |
| <b>Primers for EMSA</b>                      |                                                        |
| HBox1                                        | GAAAGGCCTTTAAGCTGGATATAAATCATAAAGGC                    |
| MutHBox1                                     | GAAAGGCCTTTAAGCTGGAT <b>CCCAT</b> TCTAAAGGC            |
| HBox2                                        | GGCATGACTAATTGCATGGTAACTGGAGAAATG                      |
| MutHBox2                                     | GGCATGACT <b>CCAT</b> GCATGGTAACTGGAGAAATG             |
| HBox3                                        | GTATTTTAGCTTGGGAAGTAATATGGGGACATTTAAACTCCTTG           |
| MutHBox3                                     | GTATTTTAGCTTGGGAAG <b>ACCA</b> ATGGGGACATTTAAACTCCTTG  |
| LongPaxHBox2Six                              | GGCATGACTAATTCCATGTAATGCATGTAATCCATGGTAACTGGAGAAATG    |
| <b>Primers for ChIP qPCR</b>                 |                                                        |
| Fwd-Myf5-145                                 | TGTGGCTCTCTCCGTATG                                     |
| Rev-Myf5-145                                 | CCCCATATTACTTCCCAAGC                                   |
| Fwd -257.5                                   | GTGTGTCAGTGCATAGCCTAA                                  |
| Rev -257.5                                   | AGGAAGAGCTTGATGGACCAA                                  |
| Fwd -55.2                                    | GTATCCGCCTCACTGAATTGAGA                                |
| Rev -55.2                                    | ACCTGGTAGAGATTACCAACAC                                 |

**Table S2. Summary of transgenes analysed and characteristics of the corresponding transient transgenic embryos.** Branchial arch expression, directed by the ba element, serves as a control of transgenesis.

| Transgene                                | Stage | N° transgenic embryos | Hypaxial lips (forelimb level) | Delaminating MPCs (forelimb level) | Branchial arches expression |
|------------------------------------------|-------|-----------------------|--------------------------------|------------------------------------|-----------------------------|
| -58/-57 baMyf5nLacZ                      | E10.5 | 8                     | NO (3/3 tested)                | NO (3/3 tested)                    | YES (8/8)                   |
| -58/-57 MutHBox2 <sup>ba</sup> Myf5nLacZ | E10.5 | 7                     | YES (4/4 tested)               | YES (4/4 tested)                   | YES (7/7)                   |

  

| Transgene                                   | Stage | N° transgenic embryos | Forelimb expression | Branchial arches expression |
|---------------------------------------------|-------|-----------------------|---------------------|-----------------------------|
| -58/-57 MutHBox1/2 <sup>3</sup> baMyf5nLacZ | E10.5 | 6                     | NO (6/6)            | YES (6/6)                   |

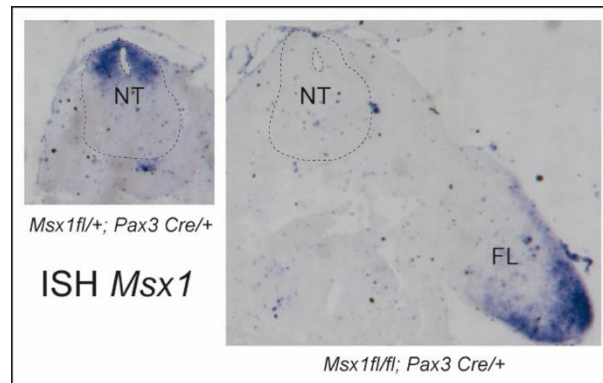

**Fig. S1. *Msx1* in situ hybridization to test Cre efficiency in *Pax3* expressing cells.** Left panel shows the dorsal-most part of a transverse section of an E10.5 *Msx1*<sup>fl/+</sup>; *Pax3*<sup>Cre/+</sup> embryo at the level of the forelimb buds. *Msx1* transcripts are detected in the *Pax3*-expressing cells in the dorsal part of the neural tube. The right panel shows an equivalent section of an E10.5 *Msx1*<sup>fl/fl</sup>; *Pax3*<sup>Cre/+</sup> embryo where the *Msx1* in situ hybridization (ISH) signal is no longer detected in the neural tube. A positive control for *Msx1* ISH is provided by distal mesenchyme of the forelimb bud where *Pax3* is not expressed. NT= neural tube. Dotted line delineates the neural tube and its lumen.

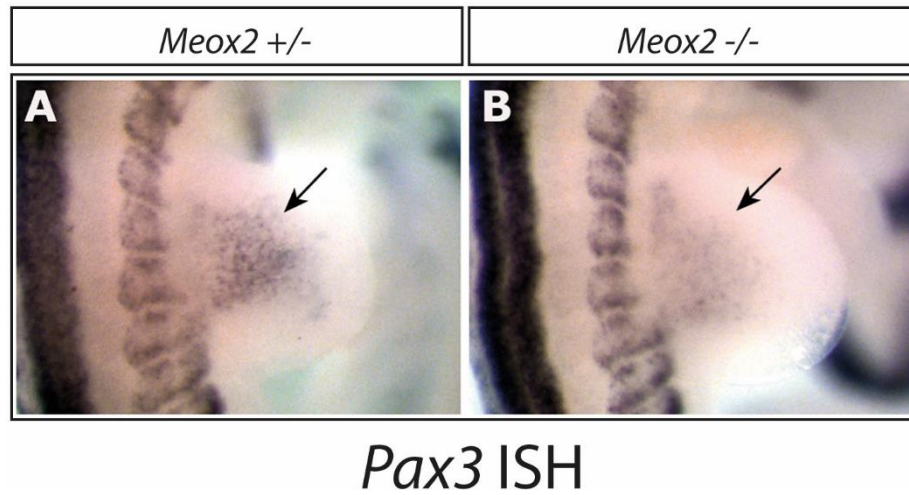

**Fig. S2. Myogenic precursor cells expressing Pax3 transcripts are present in forelimb buds of E10.75 *Meox2*<sup>-/-</sup> mutants.** Whole mount *in situ* hybridisation with a *Pax3* probe was performed on E10.75 *Meox2*<sup>+/-</sup> (A) and *Meox2*<sup>-/-</sup> embryos. These lateral views of forelimbs show that, although the level of *Pax3* transcription appears lower in the mutant (see Mankoo et al., 1999), *Pax3* positive cells (indicated by arrows), are clearly detected at this stage in the absence of *Meox2*.

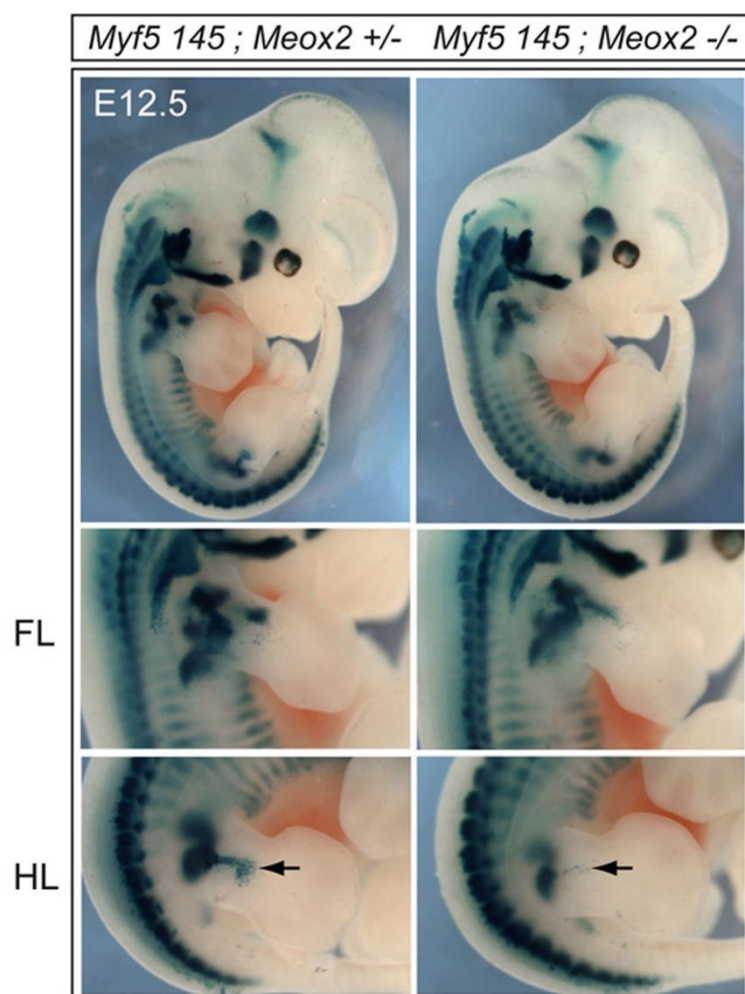

**Fig. S3.** *145-baMyf5nLacZ* transgene expression in *Meox2*<sup>+/-</sup> and *Meox2*<sup>-/-</sup> embryos at **E12.5**. X-Gal stained *145-baMyf5nLacZ* (*Myf5 145*); *Meox2*<sup>+/-</sup> (left) or *145-baMyf5nLacZ* (*Myf5 145*); *Meox2*<sup>-/-</sup> (right) embryos are shown at E12.5. Lower panels are enlargements of forelimb (FL) and hindlimb (HL) regions of these embryos. Black arrows indicate the hindlimb regions where a delay in *145baMyf5nLacZ* expression is still occurring.
